# Supplementary material for: Spatial Variations in Dengue Transmission in Schools in Thailand
Source: PLoS One. 2016 Sep 26;11(9):e0161895. doi: 10.1371/journal.pone.0161895 (PMC5036884; doi:10.1371/journal.pone.0161895)
Supplement: S2 Appendix — Data for regression model with variables: Schools, number of eligible children, actual number of participants, number of blood paired tests, number of positive blood tests, rates and number of Aedes mosquitoes captured by aspirator in June 2012. (XLSX) [file pone.0161895.s002.xlsx]

## Sheet: 2_Regression
school	eligible	participants	nr_bt	pos_bt	rate_btpos	aedes_asp_june
S02	44	28	26	0	0	3
S03	240	170	152	15	0.0986842	19
S06	194	112	110	0	0	1
S07	169	75	68	6	0.0882353	4
S10	370	294	285	3	0.0105263	1
S01	214	170	167	8	0.0479042	31
S04	345	325	262	5	0.019084	1
S05	48	45	15	0	0	3
S08	416	358	346	11	0.0317919	2
S09	274	234	224	9	0.0401786	1
